# Supplementary material for: Extended-Release Niacin or Ezetimibe and Carotid Intima–Media Thickness
Source: Atypon-hosted journal article supplement (doi:10.1056/nejmoa0907569), 2009-11-15

## Supplementary Appendix

This appendix has been provided by the authors to give readers additional information about their work.

Supplement to: Taylor AJ, Villines TC, Stanek EJ, et al. Extended-release niacin or ezetimibe and carotid intima-media thickness. *N Engl J Med* 2009;361:2113-22. DOI: 10.1056/NEJMoa0907569.

**Supplemental Table 1.** Baseline characteristics of 363 patients randomly assigned to either extended-release niacin or ezetimibe

|                                                 | Ezetimibe<br>N = 176 | Niacin<br>N = 187 | P    |
|-------------------------------------------------|----------------------|-------------------|------|
| Male gender (n, %)                              | 144 (81.8)           | 147 (78.6)        | 0.44 |
| Age, mean $\pm$ SD                              | 65 $\pm$ 11          | 65 $\pm$ 10       | 0.63 |
| Diabetes mellitus (n, %)                        | 72 (40.9)            | 73 (39.0)         | 0.71 |
| Hypertension (n, %)                             | 154 (87.5)           | 163 (87.2)        | 0.92 |
| Tobacco use (n, %)                              | 9 (5.1)              | 13 (7.0)          | 0.68 |
| Family history of coronary heart disease (n, %) | 65 (36.9)            | 88 (47.3)         | 0.05 |
| History of coronary heart disease (n, %)        |                      |                   |      |
| Angina with documented ischemia                 | 65 (36.9)            | 58 (31.2)         | 0.25 |
| Angiographic coronary disease                   | 109 (61.9)           | 116 (62.0)        | 0.98 |
| Myocardial infarction                           | 59 (33.5)            | 54 (28.9)         | 0.34 |
| Percutaneous coronary revascularization         | 70 (39.8)            | 58 (31.0)         | 0.08 |
| Coronary bypass surgery                         | 44 (25.0)            | 48 (25.7)         | 0.88 |
| Medications (n, %)                              |                      |                   |      |
| Beta blocker                                    | 125 (71.0)           | 125 (67.6)        | 0.48 |
| Aspirin (baseline and in-trial)                 | 165 (93.8)           | 176 (94.1)        | 0.88 |
| Clopidogrel                                     | 32 (24.8)            | 30 (27.0)         | 0.70 |

|                                         |              |               |      |
|-----------------------------------------|--------------|---------------|------|
| Angiotensin converting enzyme inhibitor | 100 (56.8)   | 96 (51.9)     | 0.35 |
| Statin therapy (n, %)                   |              |               |      |
| Simvastatin                             | 70 (39.8)    | 78 (41.7)     | 0.18 |
| Atorvastatin                            | 96 (54.5)    | 88 (47.1)     |      |
| Pravastatin                             | 5 (2.8)      | 9 (4.8)       |      |
| Rosuvastatin                            | 5 (2.8)      | 8 (4.3)       |      |
| Lovastatin                              | 0 (0)        | 4 (2.1)       |      |
| Mean daily statin dose (mg)             | 42 ± 24      | 42 ± 24       | 0.95 |
| Duration of statin use (years)          | 6.5 ± 5.6    | 6.1 ± 4.9     | 0.40 |
| BMI kg/m <sup>2</sup>                   | 30.8 ± 5.6   | 31.3 ± 6.4    | 0.43 |
| Waist circumference (cm)                | 40.9 ± 5.0   | 41.6 ± 5.9    | 0.27 |
| Systolic blood pressure (mm Hg)         | 137 ± 18     | 134 ± 18      | 0.08 |
| Diastolic blood pressure (mm Hg)        | 74 ± 10      | 75 ± 11       | 0.82 |
| Total cholesterol (mg/dL)               | 147.1 ± 28.6 | 146.7 ± 24.0  | 0.90 |
| LDL (mg/dL)                             | 83.4 ± 24.6  | 80.8 ± 21.5   | 0.28 |
| HDL (mg/dL)                             | 43.0 ± 9.0   | 41.9 ± 8.1    | 0.22 |
| Triglycerides (mg/dL)                   | 130.4 ± 69.3 | 138.27 ± 67.6 | 0.28 |
| Glucose (mg/dL)                         | 104.2 ± 28.1 | 104.5 ± 32.4  | 0.92 |
| High-sensitivity CRP (mg/L)             | 2.4 ± 2.3    | 2.0 ± 1.9     | 0.13 |

Data shown as mean ± standard deviation, or median (inter-quartile range) as appropriate.

|                           | <b>Baseline</b>      |                      | <b>2 Months</b>      |                      | <b>8 Months</b>      |                      | <b>14 Months</b>     |                      |
|---------------------------|----------------------|----------------------|----------------------|----------------------|----------------------|----------------------|----------------------|----------------------|
|                           | <b>Ezetimibe</b>     | <b>Niacin</b>        | <b>Ezetimibe</b>     | <b>Niacin</b>        | <b>Ezetimibe</b>     | <b>Niacin</b>        | <b>Ezetimibe</b>     | <b>Niacin</b>        |
| <b>Total Cholesterol</b>  | <b>146.6 ± 23.3</b>  | <b>143.6 ± 24.0</b>  | <b>120.2 ± 20.6</b>  | <b>131.0 ± 22.9</b>  | <b>122.4 ± 21.5</b>  | <b>133.6 ± 25.5</b>  | <b>127.8 ± 22.8</b>  | <b>136.7 ± 29.3</b>  |
| <b>P value</b>            | <b>0.90</b>          |                      | <b>0.001</b>         |                      | <b>&lt;0.001</b>     |                      | <b>0.025</b>         |                      |
| <b>HDL-C</b>              | <b>43.3 ± 8.5</b>    | <b>42.5 ± 8.6</b>    | <b>42.2 ± 8.5</b>    | <b>48.9 ± 10.6</b>   | <b>41.1 ± 9.0</b>    | <b>50.7 ± 11.6</b>   | <b>40.5 ± 7.9</b>    | <b>49.9 ± 12.2</b>   |
| <b>P value</b>            | <b>0.59</b>          |                      | <b>&lt;0.001</b>     |                      | <b>&lt;0.001</b>     |                      | <b>&lt;0.001</b>     |                      |
| <b>LDL-C</b>              | <b>83.7 ± 19.9</b>   | <b>80.5 ± 17.2</b>   | <b>60.1 ± 16.1</b>   | <b>66.2 ± 18.1</b>   | <b>61.6 ± 17.2</b>   | <b>67.1 ± 19.5</b>   | <b>66.1 ± 18.8</b>   | <b>70.5 ± 23.9</b>   |
| <b>P value</b>            | <b>0.34</b>          |                      | <b>0.013</b>         |                      | <b>0.013</b>         |                      | <b>0.12</b>          |                      |
| <b>Triglycerides</b>      | <b>122 (87-162)</b>  | <b>126 (94-163)</b>  | <b>100 (78-140)</b>  | <b>88 (69-125)</b>   | <b>107 (78-153)</b>  | <b>88 (66-123)</b>   | <b>113 (84-150)</b>  | <b>90 (69-138)</b>   |
| <b>P value</b>            | <b>0.56</b>          |                      | <b>0.033</b>         |                      | <b>0.019</b>         |                      | <b>0.018</b>         |                      |
| <b>Glucose</b>            | <b>104.0 ± 27.8</b>  | <b>104.1 ± 18.9</b>  | <b>109.6 ± 39.5</b>  | <b>109.1 ± 23.9</b>  | <b>108.2 ± 27.7</b>  | <b>107.6 ± 28.1</b>  | <b>110.4 ± 33.4</b>  | <b>107.4 ± 24.9</b>  |
| <b>P value</b>            | <b>0.20</b>          |                      | <b>0.51</b>          |                      | <b>0.53</b>          |                      | <b>0.34</b>          |                      |
| <b>C-reactive protein</b> | <b>1.9 (0.8-3.6)</b> | <b>1.3 (0.8-4.0)</b> | <b>1.2 (0.6-3.0)</b> | <b>1.1 (0.6-3.1)</b> | <b>1.3 (0.6-2.9)</b> | <b>1.1 (0.5-2.4)</b> | <b>0.6 (0.6-3.1)</b> | <b>1.0 (0.4-2.9)</b> |
| <b>P value</b>            | <b>0.51</b>          |                      | <b>0.093</b>         |                      | <b>0.067</b>         |                      | <b>0.42</b>          |                      |

Values in mg/dL except for C-reactive protein (mg/L). Data shown as mean ± standard deviation or median (inter-quartile range).

**Supplemental Table 3.** Major cardiovascular events among subjects randomized to either ezetimibe or niacin in ARBITER 6-HALTS

|                                                                     | Ezetimibe<br>N = 165 | Niacin<br>N = 160 | P    |
|---------------------------------------------------------------------|----------------------|-------------------|------|
| Myocardial infarction                                               | 3                    | 1                 |      |
| Coronary revascularization procedure                                | 3                    | 0                 |      |
| Cardiovascular death                                                | 5                    | 1                 |      |
| Subjects experiencing a composite clinical cardiovascular endpoint* | 9                    | 2                 | 0.04 |

\*Some subjects may have experienced more than one cardiovascular event. This analysis was performed among subjects who did not withdraw from the study or die from a non-cardiovascular cause.

## Supplemental Figure Legends

**Figure 1.** Flow of volunteer research subjects through ARBITER 6-HALTS

**Figure 2.** Sample image of a quantified, carotid intima media thickness scan using automated border detection in the far wall of the distal common carotid artery.

**Figure 3.** Changes in maximum carotid intima-media thickness over the 14-month study period, according to treatment group. The carotid intima-media thickness is the thickness of the far wall of the bilateral distal common carotid arteries, measured in millimeters. The P value is given for the comparison of repeated measures of the carotid intima-media thickness over the 14-month period. The vertical bars indicate standard errors.

**Figure 4.** Bivariate regression plot showing the relationship between change in LDL-C and mean carotid intima-media thickness from baseline to 14 months. Data are shown separately for ezetimibe (in blue) and niacin (in green) for the 208 subjects who completed the 14 month carotid intima-media thickness endpoint. The vertical bars indicate the 95% confidence interval.

## Supplemental Figure 1

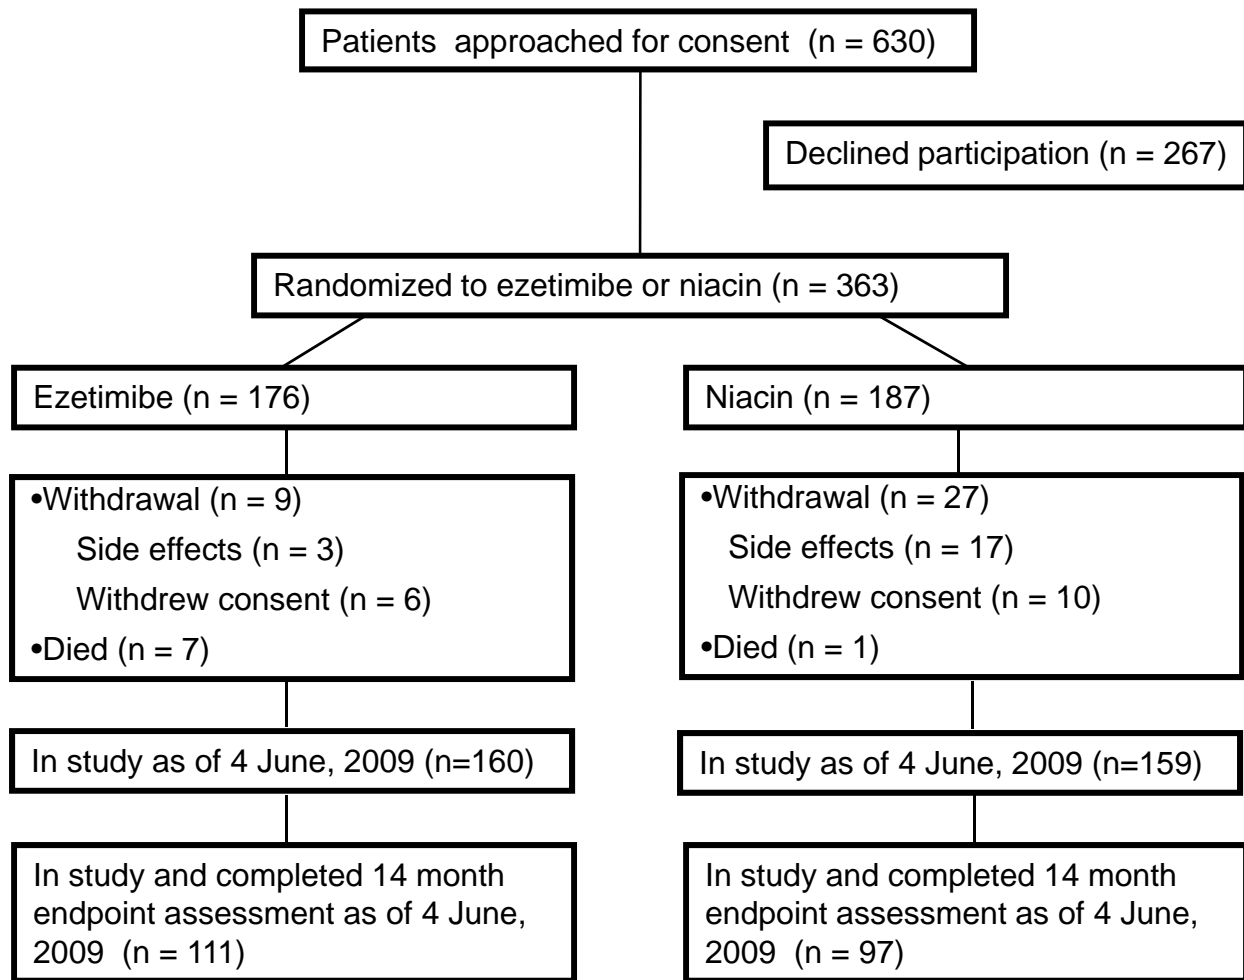

# Supplemental Figure 2

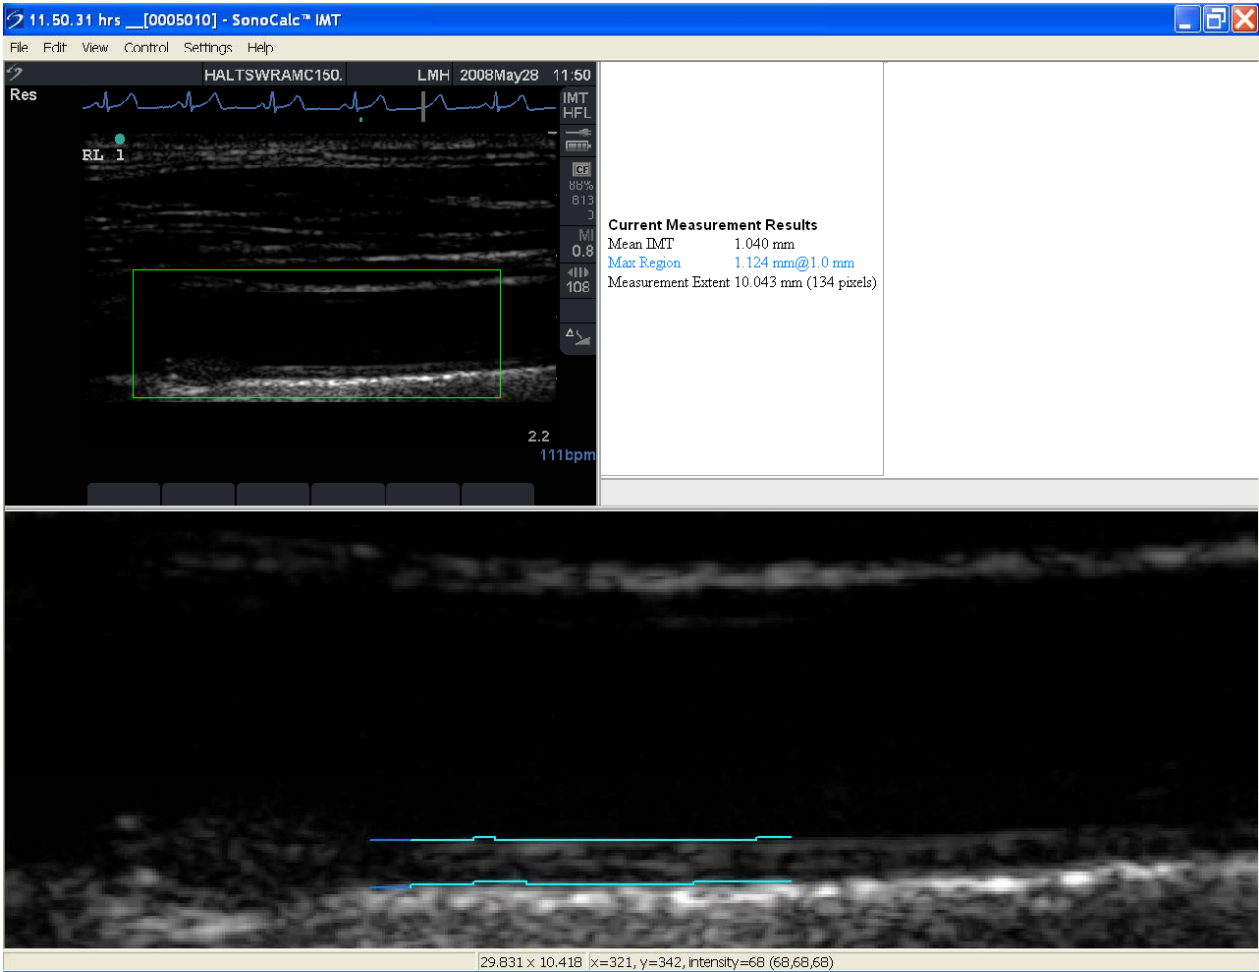

Supplemental Figure 3

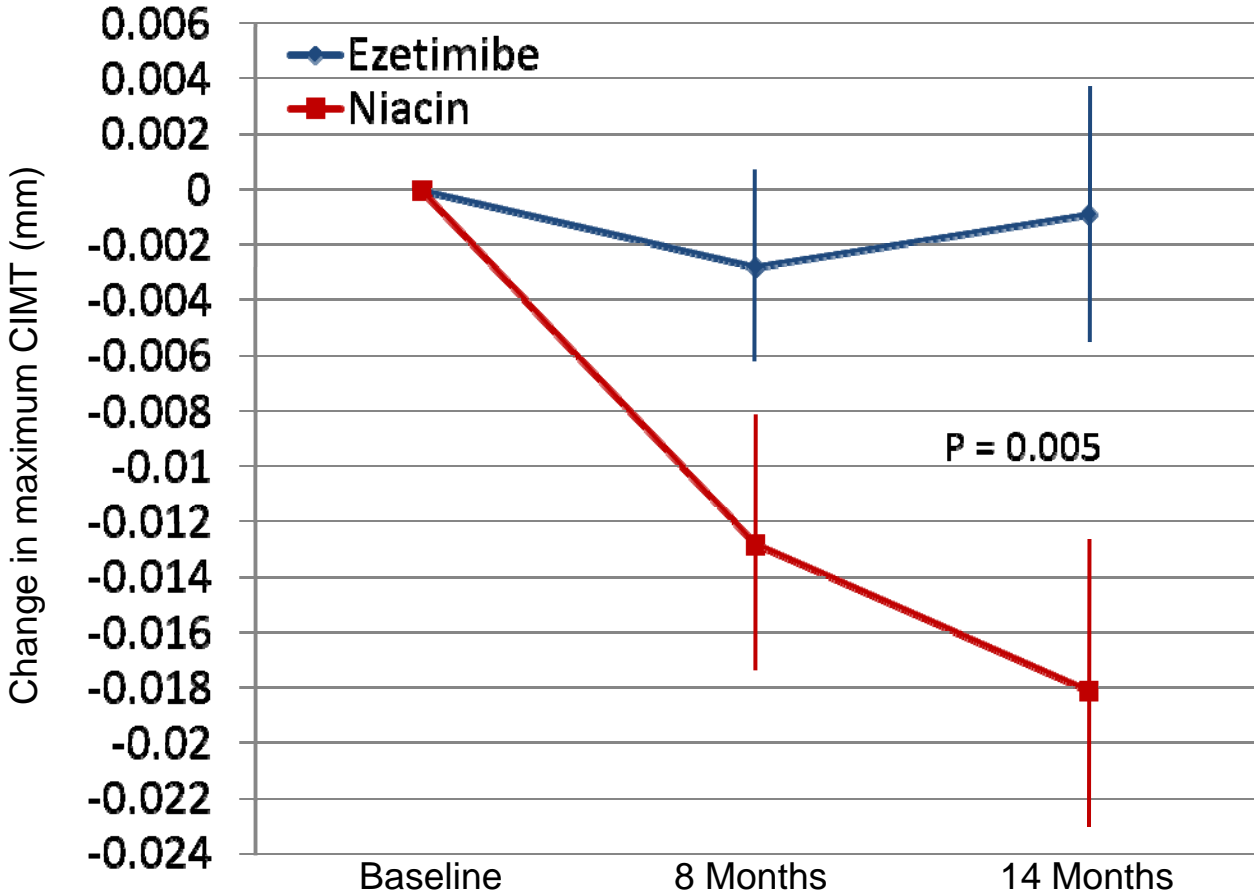

# Supplemental Figure 4

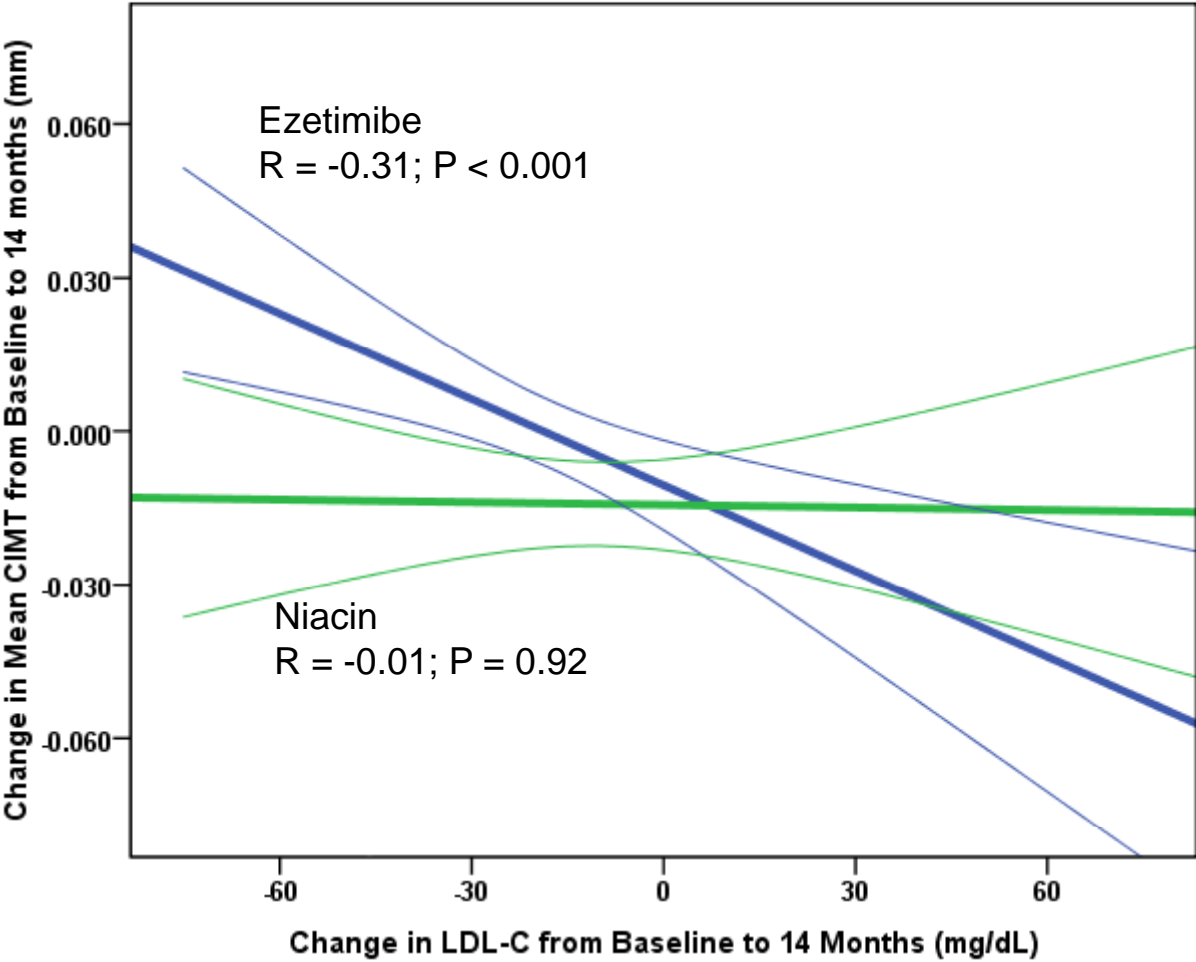

Supplement: nejm_taylor_2113sa1.pdf [file nejm_taylor_2113sa1.pdf]
